# Supplementary material for: Potential Correlation between Microbial Diversity and Volatile Flavor Substances in a Novel Chinese-Style Sausage during Storage
Source: MDPI journal article supplement (doi:10.3390/foods12173190), 2023-08-24
Supplement: s1 [file s1]

**Table S1.**  $\alpha$ -diversity index of the novel Chinese-style fermented sausage with different storage periods

|     | Bacteria |         |         |         |          | Fungus  |         |        |        |          |
|-----|----------|---------|---------|---------|----------|---------|---------|--------|--------|----------|
|     | Shannon  | Simpson | Chao1   | ACE     | Coverage | Shannon | Simpson | Chao1  | ACE    | Coverage |
| D0  | 1.742    | 0.616   | 209.148 | 212.051 | 0.999    | 1.495   | 0.619   | 77.060 | 79.177 | 1.000    |
| D7  | 1.891    | 0.646   | 219.518 | 221.558 | 1.000    | 1.239   | 0.617   | 70.704 | 68.469 | 1.000    |
| D14 | 2.658    | 0.880   | 226.777 | 226.730 | 1.000    | 1.166   | 0.579   | 70.884 | 71.136 | 1.000    |
| D30 | 2.456    | 0.829   | 247.950 | 236.241 | 1.000    | 0.961   | 0.469   | 64.603 | 67.194 | 1.000    |
| D60 | 1.618    | 0.576   | 208.435 | 209.003 | 1.000    | 0.267   | 0.095   | 47.292 | 51.236 | 1.000    |

**Table S2.** Volatile flavor composition of the novel Chinese-style fermented sausages with different storage periods

| NO. | Name and category of volatile flavor compounds | RT    | CAS        | Relative content/%      |                         |                         |                         |                         |
|-----|------------------------------------------------|-------|------------|-------------------------|-------------------------|-------------------------|-------------------------|-------------------------|
|     |                                                |       |            | D0                      | D7                      | D14                     | D30                     | D60                     |
| A1  | ethyl butanoate                                | 6.23  | 105-54-4   | -                       | -                       | 3.63±0.32 <sup>a</sup>  | 1.24±0.14 <sup>c</sup>  | 1.90±0.09 <sup>b</sup>  |
| A2  | Ethyl lactate                                  | 6.71  | 97-64-3    | -                       | 0.50±0.14 <sup>c</sup>  | 0.66±0.05 <sup>b</sup>  | 0.56±0.06 <sup>bc</sup> | 0.95±0.13 <sup>a</sup>  |
| A3  | Ethyl 2-methylbutanoate                        | 8.07  | 7452-79-1  | -                       | 0.22±0.06 <sup>ab</sup> | 0.32±0.04 <sup>ab</sup> | -                       | 0.12±0.01 <sup>bc</sup> |
| A4  | Ethyl isovalerate                              | 8.20  | 108-64-5   | -                       | 0.77±0.22 <sup>a</sup>  | 0.97±0.15 <sup>a</sup>  | 0.45±0.05 <sup>b</sup>  | 0.55±0.06 <sup>b</sup>  |
| A5  | Isoamyl acetate                                | 9.22  | 123-92-2   | -                       | -                       | 0.19±0.02 <sup>b</sup>  | -                       | 0.26±0.02 <sup>a</sup>  |
| A6  | vinyl hexanoate                                | 14.13 | 3050-69-9  | 1.42±0.05 <sup>a</sup>  | -                       | -                       | -                       | -                       |
| A7  | linalyl formate                                | 14.34 | 115-99-1   | 0.55±0.05 <sup>a</sup>  | -                       | -                       | -                       | -                       |
| A8  | Ethyl hexanoate                                | 14.90 | 123-66-0   | 0.89±0.05 <sup>d</sup>  | 8.91±1.04 <sup>b</sup>  | 12.17±0.90 <sup>a</sup> | 6.49±0.09 <sup>c</sup>  | 7.21±0.96 <sup>bc</sup> |
| A9  | 2-ethylhexyl butanoate                         | 17.66 | 25415-84-3 | -                       | -                       | -                       | -                       | 0.14±0.02 <sup>a</sup>  |
| A10 | Ethyl benzoate                                 | 23.48 | 93-89-0    | -                       | -                       | -                       | 0.20±0.01 <sup>a</sup>  | 0.12±0.01 <sup>b</sup>  |
| A11 | Phenyl isothiocyanate                          | 24.87 | 103-72-0   | 0.16±0.02 <sup>ab</sup> | 0.31±0.01 <sup>a</sup>  | 0.25±0.02 <sup>ab</sup> | -                       | -                       |
| A12 | Ethyl caprylate                                | 25.19 | 106-32-1   | 1.20±0.20 <sup>b</sup>  | 7.89±0.13 <sup>a</sup>  | 8.36±0.86 <sup>a</sup>  | 6.50±0.60 <sup>a</sup>  | 8.31±1.00 <sup>a</sup>  |
| A13 | Ethyl phenylacetate                            | 27.39 | 101-97-3   | -                       | 0.24±0.03 <sup>b</sup>  | 0.24±0.03 <sup>b</sup>  | 0.28±0.03 <sup>b</sup>  | 0.33±0.03 <sup>a</sup>  |
| A14 | Linalyl acetate                                | 27.91 | 115-95-7   | 0.09±0.01 <sup>d</sup>  | 0.33±0.03 <sup>bc</sup> | 0.28±0.03 <sup>c</sup>  | 0.43±0.04 <sup>bc</sup> | 1.14±0.06 <sup>a</sup>  |
| A15 | Ethyl nonanoate                                | 29.92 | 123-29-5   | -                       | 0.26±0.01 <sup>c</sup>  | 0.36±0.04 <sup>b</sup>  | 0.41±0.02 <sup>a</sup>  | 0.36±0.02 <sup>b</sup>  |
| A16 | 9-decenoate ethyl                              | 32.53 | 67233-91-4 | -                       | 0.40±0.04 <sup>b</sup>  | 0.36±0.02 <sup>b</sup>  | 0.82±0.09 <sup>a</sup>  | 0.86±0.04 <sup>a</sup>  |
| A17 | Ethyl caprate                                  | 32.69 | 110-38-3   | 0.62±0.05 <sup>c</sup>  | 4.18±0.52 <sup>b</sup>  | 5.02±0.48 <sup>b</sup>  | 9.61±0.45 <sup>a</sup>  | 10.18±0.75 <sup>a</sup> |
| A18 | Ethyl laurate                                  | 35.90 | 106-33-2   | -                       | 0.26±0.02 <sup>c</sup>  | -                       | 1.61±0.13 <sup>a</sup>  | 1.07±0.02 <sup>b</sup>  |
| A19 | Ethyl tetradecanoate                           | 38.56 | 124-06-1   | -                       | -                       | -                       | 3.22±0.50 <sup>a</sup>  | 1.38±0.15 <sup>b</sup>  |
| A20 | 9-hexadecenoate ethyl                          | 40.55 | 54546-22-4 | -                       | -                       | -                       | 0.66±0.08 <sup>a</sup>  | 0.31±0.07 <sup>b</sup>  |
| A21 | Ethyl palmitate                                | 40.76 | 628-97-7   | -                       | -                       | -                       | 3.27±0.34 <sup>a</sup>  | 1.56±0.13 <sup>b</sup>  |
| A22 | ethyl linoleate                                | 42.43 | 7619-08-1  | -                       | -                       | -                       | 0.52±0.06 <sup>a</sup>  | -                       |
| A23 | Ethyl Oleate                                   | 42.48 | 111-62-6   | -                       | -                       | -                       | 2.60±0.15 <sup>a</sup>  | 1.27±0.34 <sup>b</sup>  |
| B1  | Sabinene                                       | 13.35 | 3387-41-5  | 0.16±0.02 <sup>a</sup>  | -                       | -                       | -                       | -                       |
| B2  | $\beta$ -Myrcene                               | 14.35 | 123-35-3   | 0.81±0.08 <sup>a</sup>  | -                       | -                       | 0.91±0.08 <sup>a</sup>  | -                       |
| B3  | D-Limonene                                     | 16.00 | 5989-27-5  | 24.20±2.13 <sup>a</sup> | 16.92±0.66 <sup>b</sup> | 15.00±0.77 <sup>b</sup> | 12.93±0.72 <sup>c</sup> | 11.32±0.66 <sup>c</sup> |
| B4  | Santolina triene                               | 16.64 | 2153-66-4  | -                       | -                       | -                       | -                       | 0.06±0.10 <sup>a</sup>  |
| B5  | $\gamma$ -Terpinene                            | 17.51 | 99-85-4    | 0.56±0.10 <sup>a</sup>  | 0.30±0.06 <sup>b</sup>  | 0.35±0.03 <sup>b</sup>  | 0.31±0.03 <sup>b</sup>  | -                       |
| B6  | $\alpha$ -Copaene                              | 32.14 | 3856-25-5  | 0.34±0.03 <sup>b</sup>  | 0.54±0.08 <sup>b</sup>  | 0.44±0.07 <sup>b</sup>  | 0.96±0.08 <sup>a</sup>  | 0.53±0.04 <sup>b</sup>  |

|     |                                    |              |       |            |                         |                         |                         |                         |                        |
|-----|------------------------------------|--------------|-------|------------|-------------------------|-------------------------|-------------------------|-------------------------|------------------------|
| B7  | Caryophyllene                      |              | 33.07 | 87-44-5    | 1.98±0.09 <sup>b</sup>  | 1.69±0.16 <sup>bc</sup> | 1.28±0.08 <sup>c</sup>  | 2.99±0.28 <sup>a</sup>  | 1.89±0.11 <sup>b</sup> |
| B8  | cis- $\alpha$ -Bergamotene         |              | 33.40 | 18252-46-5 | -                       | 0.14±0.12 <sup>b</sup>  | -                       | 0.40±0.01 <sup>a</sup>  | 0.21±0.04 <sup>b</sup> |
| B9  | $\alpha$ -caryophyllene            |              | 33.70 | 6753-98-6  | -                       | -                       | -                       | 0.25±0.01 <sup>a</sup>  | -                      |
| B10 | $\gamma$ -Muurelene                |              | 34.38 | 30021-74-0 | -                       | 0.24±0.01 <sup>a</sup>  | -                       | -                       | -                      |
| B11 | (-)- $\alpha$ -Cedrene             |              | 34.38 | 469-61-4   | -                       | -                       | -                       | -                       | 0.24±0.21 <sup>a</sup> |
| B12 | (+)- $\alpha$ -Funebrene           |              | 34.38 | 50894-66-1 | -                       | -                       | -                       | 0.83±0.07 <sup>a</sup>  | 0.16±0.27 <sup>b</sup> |
| B13 | $\beta$ -Bisabolene                |              | 34.58 | 495-61-4   | -                       | -                       | -                       | 0.40±0.05 <sup>a</sup>  | -                      |
| B14 | (+)- $\delta$ -cadinene            |              | 34.82 | 483-76-1   | -                       | 0.13±0.01 <sup>c</sup>  | -                       | 0.53±0.04 <sup>a</sup>  | 0.27±0.04 <sup>b</sup> |
| C1  | 3-methyl-1-Butanol                 |              | 4.32  | 123-51-3   | 0.70±0.02 <sup>b</sup>  | -                       | -                       | -                       | 3.04±0.21 <sup>a</sup> |
| C2  | 3-methyl-1-Heptanol                |              | 4.47  | 1070-32-2  | -                       | 0.74±0.02 <sup>a</sup>  | -                       | -                       | -                      |
| C3  | (2R,3R)-(-)-2,3-Butanediol         |              | 5.84  | 24347-58-8 | 0.26±0.01 <sup>b</sup>  | 0.25±0.02 <sup>b</sup>  | 0.69±0.07 <sup>b</sup>  | 1.00±0.04 <sup>b</sup>  | 2.22±0.09 <sup>a</sup> |
| C4  | 1-Hexanol                          |              | 8.97  | 111-27-3   | 0.23±0.09 <sup>a</sup>  | -                       | -                       | -                       | 0.23±0.02 <sup>a</sup> |
| C5  | 1-Octen-3-ol                       |              | 13.96 | 3391-86-4  | 1.31±0.03 <sup>a</sup>  | 1.08±0.03 <sup>ab</sup> | 0.73±0.08 <sup>bc</sup> | 0.36±0.02 <sup>c</sup>  | -                      |
| C6  | Eucalyptol                         |              | 16.13 | 470-82-6   | 1.52±0.11 <sup>a</sup>  | 0.82±0.07 <sup>b</sup>  | 0.71±0.05 <sup>b</sup>  | 0.45±0.05 <sup>c</sup>  | 0.56±0.06 <sup>c</sup> |
| C7  | 3,5-Octadien-2-ol                  | Alcohols     | 16.76 | 69668-82-2 | -                       | 0.18±0.01 <sup>a</sup>  | -                       | -                       | -                      |
| C8  | (Z)-2-Nonen-1-ol                   |              | 18.34 | 41453-56-9 | 0.20±0.03 <sup>a</sup>  | -                       | -                       | -                       | -                      |
| C9  | trans-2-Pinanol                    |              | 19.41 | 4948-29-2  | -                       | -                       | 0.38±0.04 <sup>a</sup>  | -                       | -                      |
| C10 | Linalool                           |              | 19.68 | 78-70-6    | 2.15±0.21 <sup>a</sup>  | 1.59±0.11 <sup>b</sup>  | 1.69±0.16 <sup>b</sup>  | 1.33±0.16 <sup>c</sup>  | 1.38±0.10 <sup>c</sup> |
| C11 | Phenylethyl Alcohol                |              | 20.28 | 60-12-8    | 1.06±0.10 <sup>c</sup>  | 1.42±0.26 <sup>c</sup>  | 1.59±0.17 <sup>bc</sup> | 2.13±0.23 <sup>b</sup>  | 5.78±0.73 <sup>a</sup> |
| C12 | Terpinen-4-ol                      |              | 23.73 | 562-74-3   | 0.82±0.09 <sup>a</sup>  | 0.49±0.04 <sup>b</sup>  | 0.54±0.07 <sup>b</sup>  | 0.36±0.03 <sup>c</sup>  | 0.48±0.05 <sup>b</sup> |
| C13 | $\alpha$ -Terpineol                |              | 24.59 | 98-55-5    | 0.11±0.01 <sup>b</sup>  | 0.26±0.01 <sup>a</sup>  | 0.21±0.01 <sup>a</sup>  | -                       | 0.25±0.02 <sup>a</sup> |
| D1  | Valeraldehyde                      |              | 3.44  | 110-62-3   | -                       | 0.24±0.01 <sup>a</sup>  | -                       | -                       | -                      |
| D2  | Hexanal                            |              | 6.07  | 66-25-1    | 15.94±1.47 <sup>a</sup> | 8.4±0.95 <sup>b</sup>   | 5.46±0.36 <sup>b</sup>  | 1.17±0.07 <sup>c</sup>  | 0.47±0.02 <sup>c</sup> |
| D3  | Heptanal                           |              | 10.15 | 111-71-7   | 1.12±0.02 <sup>a</sup>  | 0.95±0.15 <sup>a</sup>  | 0.84±0.09 <sup>a</sup>  | -                       | 0.96±0.08 <sup>a</sup> |
| D4  | Methional                          |              | 10.38 | 3268-49-3  | -                       | -                       | -                       | 0.24±0.02 <sup>b</sup>  | 0.54±0.07 <sup>a</sup> |
| D5  | (Z)-2-Heptenal                     |              | 12.68 | 57266-86-1 | -                       | 0.77±0.06 <sup>b</sup>  | 1.00±0.03 <sup>a</sup>  | -                       | -                      |
| D6  | (E)-2-Heptenal                     |              | 12.69 | 18829-55-5 | 0.87±0.08 <sup>a</sup>  | -                       | -                       | -                       | -                      |
| D7  | Benzaldehyde                       | Aldehyde     | 12.78 | 100-52-7   | -                       | -                       | -                       | -                       | 1.60±0.14 <sup>a</sup> |
| D8  | Phenylacetaldehyde                 |              | 16.84 | 122-78-1   | 1.72±0.12 <sup>b</sup>  | 1.19±0.02 <sup>c</sup>  | 1.27±0.05 <sup>c</sup>  | 1.26±0.23 <sup>c</sup>  | 2.24±0.21 <sup>a</sup> |
| D9  | (E)-2-Octenal                      |              | 17.62 | 2548-87-0  | 0.28±0.04 <sup>b</sup>  | 0.82±0.07 <sup>a</sup>  | 0.70±0.07 <sup>a</sup>  | -                       | -                      |
| D10 | Nonanal                            |              | 19.87 | 124-19-6   | 2.32±0.31 <sup>a</sup>  | 2.39±0.21 <sup>a</sup>  | 2.09±0.22 <sup>a</sup>  | 1.49±0.12 <sup>b</sup>  | 1.02±0.10 <sup>b</sup> |
| D11 | (E)-2-Nonenal                      |              | 22.82 | 18829-56-6 | -                       | 0.24±0.04 <sup>a</sup>  | 0.18±0.02 <sup>b</sup>  | -                       | -                      |
| D12 | (E)-2-Decenal                      |              | 28.09 | 3913-81-3  | -                       | 0.12±0.01 <sup>a</sup>  | -                       | -                       | -                      |
| D13 | 2-phenyl-2-butenal                 |              | 28.61 | 4411-89-6  | -                       | 0.30±0.07 <sup>b</sup>  | -                       | 0.34±0 <sup>b</sup>     | 2.28±0.19 <sup>a</sup> |
| E1  | 2,3-Epoxy-4,4-dimethylpentane      |              | 4.33  | 53897-30-6 | 1.07±0.09 <sup>c</sup>  | 2.25±0.28 <sup>b</sup>  | 3.22±0.47 <sup>a</sup>  | 2.79±0.25 <sup>ab</sup> | -                      |
| E2  | 1-Chloropentane                    |              | 5.24  | 543-59-9   | 0.21±0.36 <sup>a</sup>  | -                       | -                       | -                       | -                      |
| E3  | Octane                             |              | 6.01  | 111-65-9   | -                       | 0.15±0.01 <sup>a</sup>  | -                       | -                       | -                      |
| E4  | p-Xylene                           |              | 8.62  | 106-42-3   | -                       | 0.16±0.02 <sup>a</sup>  | -                       | -                       | -                      |
| E5  | Styrene                            |              | 9.54  | 100-42-5   | 0.55±0.05 <sup>d</sup>  | 0.62±0.8 <sup>cd</sup>  | 0.76±0.03 <sup>bc</sup> | 0.94±0.11 <sup>ab</sup> | 1.08±0.11 <sup>a</sup> |
| E6  | 1-Bromo-3,7-dimethyl-2,6-octadiene | Hydrocarbons | 14.35 | 35719-26-7 | -                       | 0.40±0.07 <sup>b</sup>  | 1.2±0.11 <sup>a</sup>   | -                       | -                      |
| E7  | m-cymene                           |              | 15.82 | 535-77-3   | 1.80±0.05 <sup>a</sup>  | -                       | 1.11±0.05 <sup>b</sup>  | 0.81±0.12 <sup>c</sup>  | 0.83±0.08 <sup>c</sup> |
| E8  | o-Cymene                           |              | 15.82 | 527-84-4   | -                       | 1.10±0.13 <sup>a</sup>  | -                       | -                       | -                      |
| E9  | 2,9-Dimethyl-5-decyne              |              | 18.34 | 19550-56-2 | -                       | 0.54±0.07 <sup>a</sup>  | -                       | -                       | -                      |
| E10 | 2-Tetradecene                      |              | 18.34 | 638-60-8   | -                       | -                       | 0.37±0.02 <sup>a</sup>  | -                       | -                      |

|     |                              |         |       |            |                         |                          |                         |                         |                          |
|-----|------------------------------|---------|-------|------------|-------------------------|--------------------------|-------------------------|-------------------------|--------------------------|
| E11 | $\alpha$ -Curcumene          |         | 34.18 | 644-30-4   | 0.29±0.06 <sup>b</sup>  | 0.38±0.05 <sup>b</sup>   | 0.28±0.04 <sup>b</sup>  | 0.91±0.01 <sup>a</sup>  | 0.45±0.04 <sup>b</sup>   |
| F1  | Dimethyl ether               |         | 6.94  | 115-10-6   | -                       | -                        | -                       | -                       | 1.07±0.07 <sup>a</sup>   |
| F2  | 2-Ethylhexyl glycidyl ether  | Ethers  | 17.66 | 2461-15-6  | -                       | -                        | -                       | -                       | 0.07±0.01 <sup>a</sup>   |
| F3  | Estragole                    |         | 25.04 | 140-67-0   | 4.69±0.57 <sup>a</sup>  | 2.95±0.26 <sup>b</sup>   | 2.72±0.18 <sup>b</sup>  | 3.15±0.19 <sup>b</sup>  | 3.18±0.45 <sup>b</sup>   |
| F4  | Anethole                     |         | 29.25 | 104-46-1   | 25.27±3.96 <sup>a</sup> | 17.25±1.90 <sup>bc</sup> | 13.94±1.96 <sup>c</sup> | 19.28±1.68 <sup>b</sup> | 16.62±1.54 <sup>bc</sup> |
| G1  | Acetoin                      |         | 3.71  | 513-86-0   | 1.35±0.17 <sup>c</sup>  | 5.06±1.19 <sup>b</sup>   | 7.10±0.88 <sup>c</sup>  | 1.03±0.07 <sup>c</sup>  | -                        |
| G2  | 3,5-Octadien-2-one           | Ketones | 18.32 | 38284-27-4 | -                       | 0.86±0.04 <sup>a</sup>   | -                       | -                       | -                        |
| G3  | Fenchone                     |         | 18.91 | 1195-79-5  | 0.74±0.09 <sup>a</sup>  | 0.42±0.05 <sup>b</sup>   | 0.36±0.05 <sup>b</sup>  | -                       | -                        |
| H1  | Diisopropylamine             |         | 3.47  | 108-18-9   | -                       | -                        | 0.76±0.07 <sup>a</sup>  | -                       | -                        |
| H2  | Methyltartronic acid         |         | 6.92  | 595-98-2   | -                       | -                        | -                       | -                       | 0.19±0.01 <sup>a</sup>   |
| H3  | N-succinimidyl benzoate      |         | 12.77 | 23405-15-4 | 0.41±0.02 <sup>b</sup>  | 1.38±0.02 <sup>a</sup>   | -                       | 1.08±0.09 <sup>a</sup>  | -                        |
| H4  | 4-Ethyl-5-methylthiazole     | Others  | 16.29 | 52414-91-2 | -                       | -                        | -                       | -                       | 0.28±0.03 <sup>a</sup>   |
| H5  | 2,3-Dimethyl-5-ethylpyrazine |         | 19.10 | 15707-34-3 | -                       | -                        | -                       | 0.25±0.03 <sup>a</sup>  | 0.28±0.03 <sup>a</sup>   |
| H6  | Octanoic acid                |         | 24.33 | 124-07-2   | -                       | -                        | 0.21±0.01 <sup>a</sup>  | -                       | -                        |
| H7  | Eugenol                      |         | 31.79 | 97-53-0    | -                       | -                        | -                       | 0.24±0.02 <sup>a</sup>  | 0.22±0.01 <sup>b</sup>   |

Different superscript letters in the same row indicate significant differences (P<0.05).
